# Supplementary material for: Nano-optical designs for high-efficiency monolithic perovskite–silicon tandem solar cells
Source: PubMed Central journal article supplement (PMC9646483; doi:10.1038/s41565-022-01228-8), 2022-10-24
Supplement: 41565_2022_1228_MOESM1_ESM.pdf [file 41565_2022_1228_MOESM1_ESM.pdf]

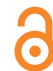

---

# Nano-optical designs for high-efficiency monolithic perovskite–silicon tandem solar cells

---

In the format provided by the authors and unedited

---

# Supporting Information

## Nano-optical designs for high efficiency monolithic perovskite-silicon tandem solar cells

*Philipp Tockhorn<sup>1#</sup>, Johannes Sutter<sup>1#</sup>, Alexandros Cruz<sup>1</sup>, Philipp Wagner<sup>1</sup>, Klaus Jäger<sup>1,2</sup>, Danbi Yoo<sup>1</sup>, Felix Lang<sup>3</sup>, Max Grischek<sup>1,3</sup>, Bor Li<sup>1</sup>, Jinzhao Li<sup>1</sup>, Oleksandra Shargaieva<sup>1</sup>, Eva Unger<sup>1,4</sup>, Amran Al-Ashouri<sup>1</sup>, Eike Köhnen<sup>1</sup>, Martin Stolterfoht<sup>3</sup>, Dieter Neher<sup>3</sup>, Rutger Schlatmann<sup>1,5</sup>, Bernd Rech<sup>1,6</sup>, Bernd Stannowski<sup>1,7</sup>, Steve Albrecht<sup>1,6\*</sup>, Christiane Becker<sup>1,5\*</sup>*

<sup>1</sup> Helmholtz-Zentrum Berlin für Materialien und Energie GmbH, Division Solar Energy, Kekuléstr. 5, 12489, Berlin, Germany

<sup>2</sup> Zuse Institute Berlin, Computational Nanooptics Group, Takustr. 7, 14195 Berlin, Germany

<sup>3</sup> Universität Potsdam, Soft matter physics, Karl-Liebknecht-Straße 24/25, 14476 Potsdam, Germany

<sup>4</sup> Humboldt Universität zu Berlin, Department of Chemistry, Brook-Taylor-Strasse 2, 12489 Berlin, Germany

<sup>5</sup> Hochschule für Technik und Wirtschaft Berlin, Faculty 1: School of Engineering – Energy and Information, 10313 Berlin, Germany

<sup>6</sup> Technische Universität Berlin, Faculty of Electrical Engineering and Computer Science, 10587 Berlin, Germany

<sup>7</sup> Berliner Hochschule für Technik, 13353 Berlin

# These authors contributed equally to this work. Order determined by cast of 298 sided digital dice.

\* Email: [steve.albrecht@helmholtz-berlin.de](mailto:steve.albrecht@helmholtz-berlin.de), [christiane.becker@helmholtz-berlin.de](mailto:christiane.becker@helmholtz-berlin.de)

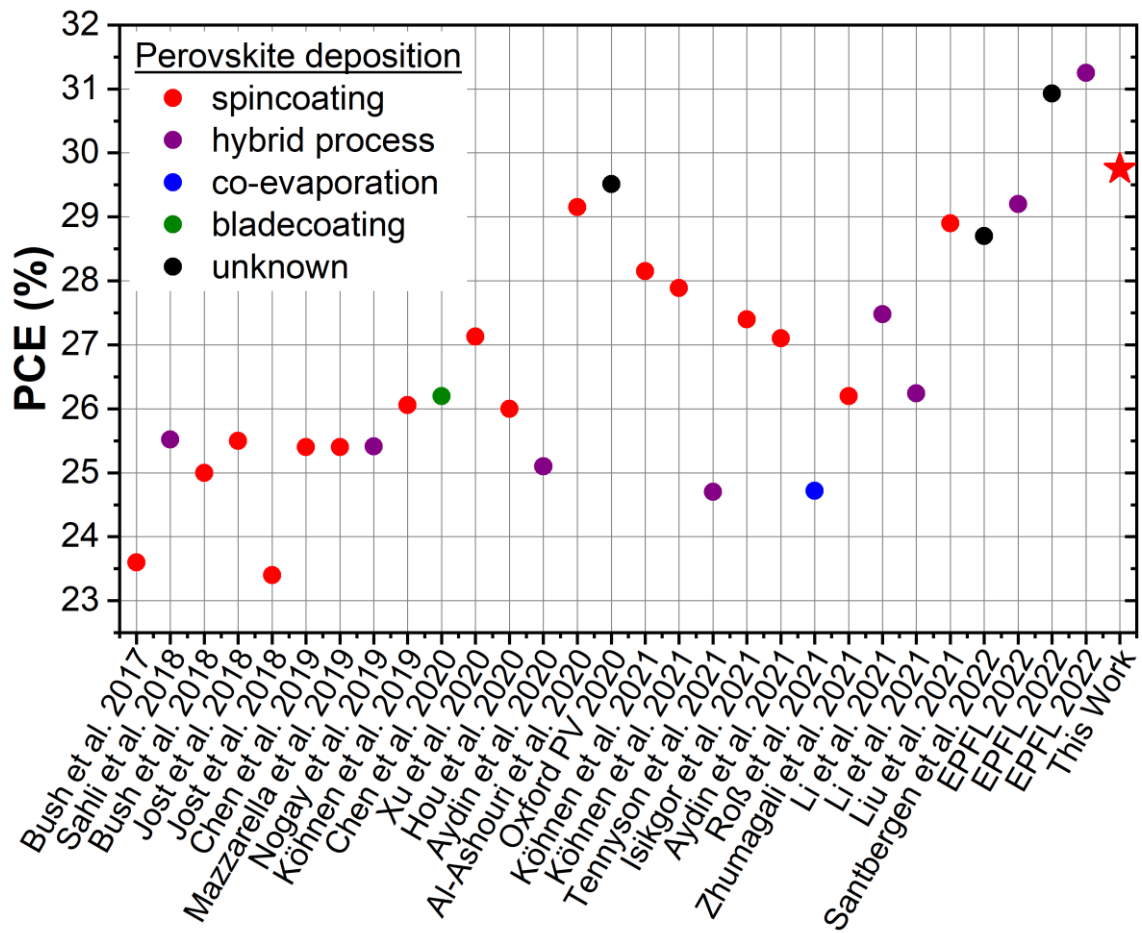

**Figure S1** | Overview of 2-terminal perovskite/silicon tandem solar cells (PSTSC) with power conversion efficiency (PCE) >23%. The different colors mark the deposition technique of the perovskite absorber, as displayed in the legend.

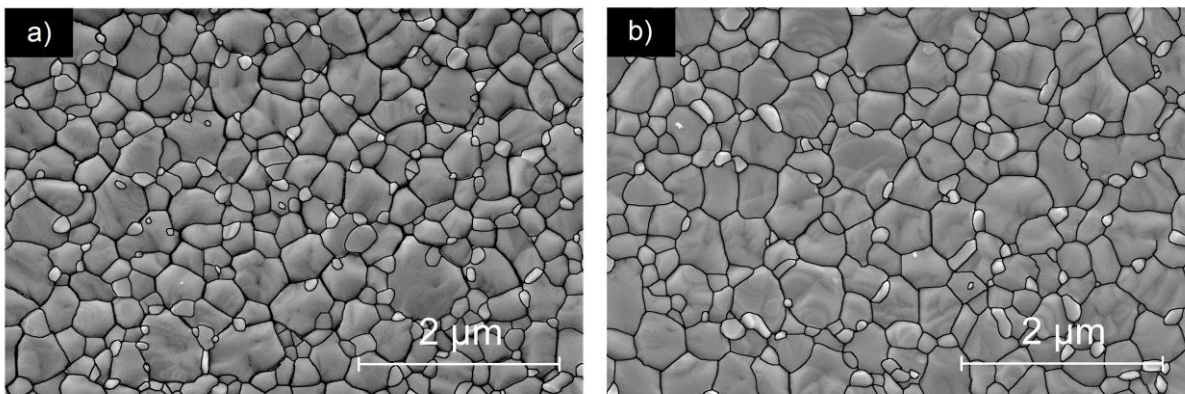

**Figure S2** | Top-view scanning electron microscope (SEM) images of bare perovskite layers deposited on planar (a) and nanotextured (b) substrates. The grain size analysis in Fig. 2f is based on these images.

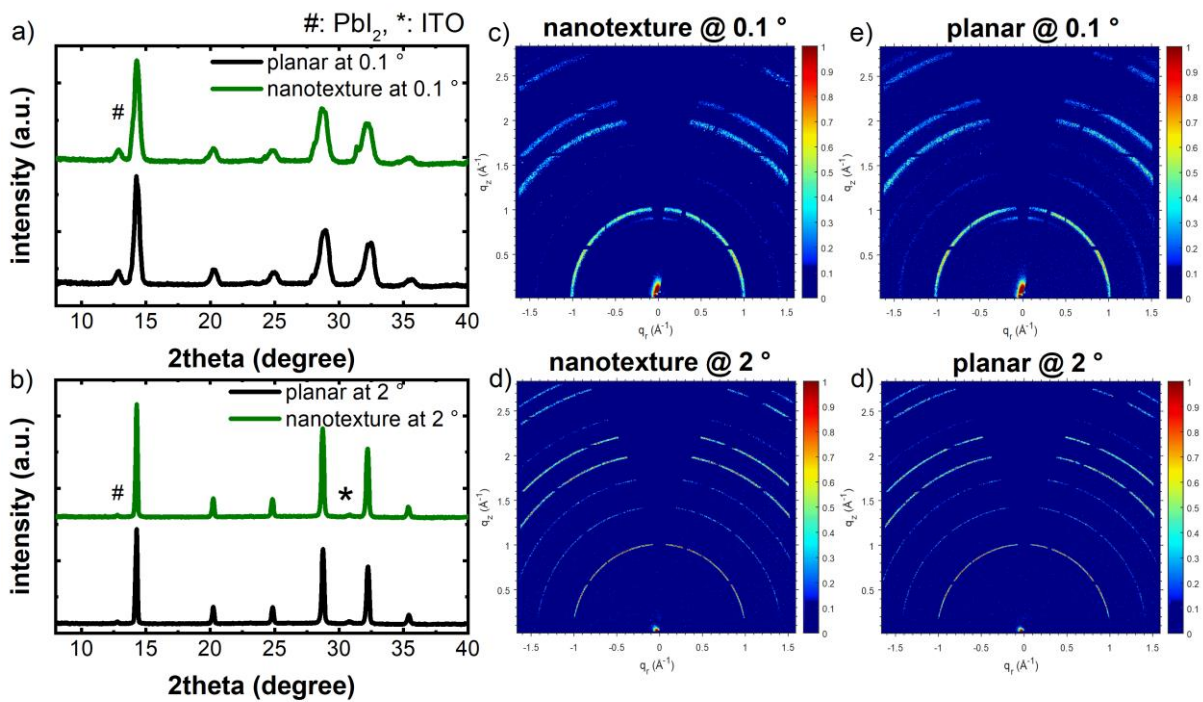

**Figure S3** | (a-b) Azimuthally integrated diffraction patterns and (c-f) GIWAXS maps at grazing incidence angles of 0.1 and 2° of perovskite layers deposited onto planar (a,c,e) and nanotextured (b,d,f) silicon bottom cells.

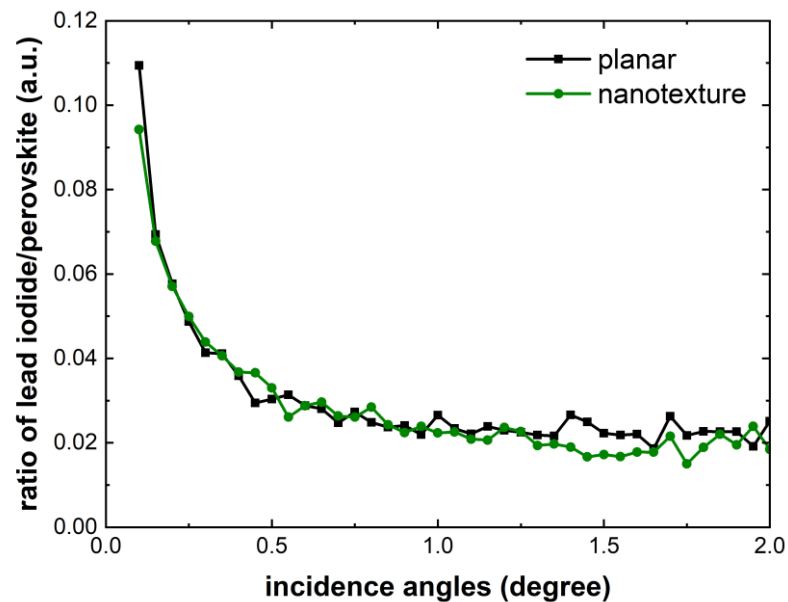

**Figure S4** | Integrated peak area ratio of (001) reflection of lead iodide/ (100) reflection of perovskite versus incidence angles. Considering that the probing depth increases with incidence angle, the results indicate the accumulation of Pb on the surface.

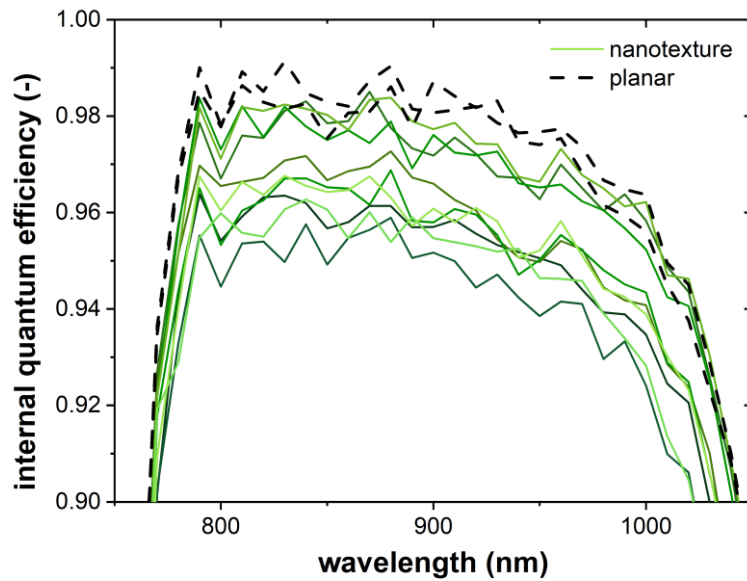

**Figure S5 |** Internal quantum efficiency (IQE) defined as  $IQE = EQE/(1-R)$  of planar (black dashed lines) and nanotextured silicon bottom cells (green lines).

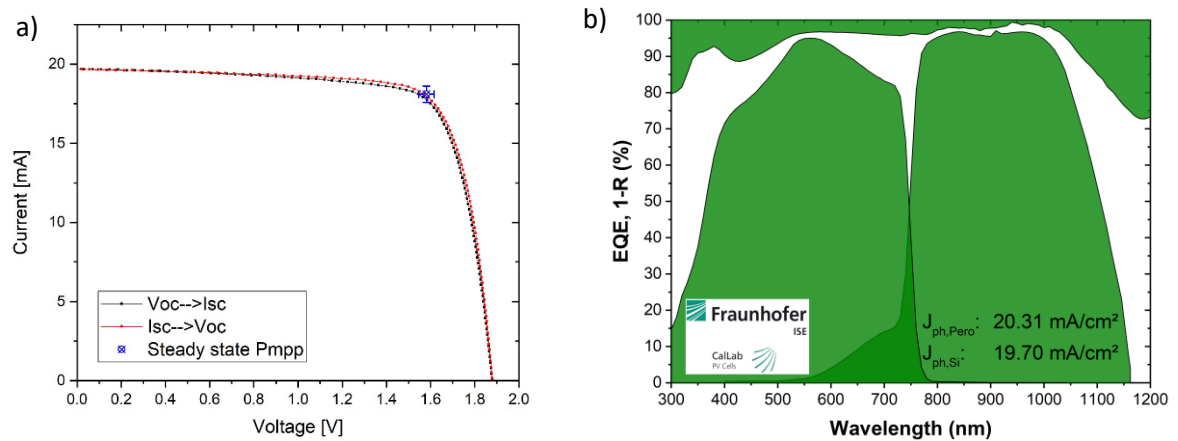

**Figure S6 |** (a) Current/voltage ( $J-V$ ) characteristics of a nanotextured PSTSC with standard rear reflector (no RDBL) certified by CallLab at Fraunhofer ISE. The maximum power point (MPP) value is marked as a blue cross. (b) Corresponding external quantum efficiency (EQE) measurement of a nanotextured PSTSC with standard rear reflector with summed up short circuit current density from EQE ( $J_{ph,pero} + J_{ph,si}$ ) = 40 mA/cm<sup>2</sup> the 1-R spectrum was measured in-house. Note that the EQE spectra were measured in the wavelength range from 300-1162 nm, which leads to a slight underestimation of the photogenerated current density of the silicon subcell.

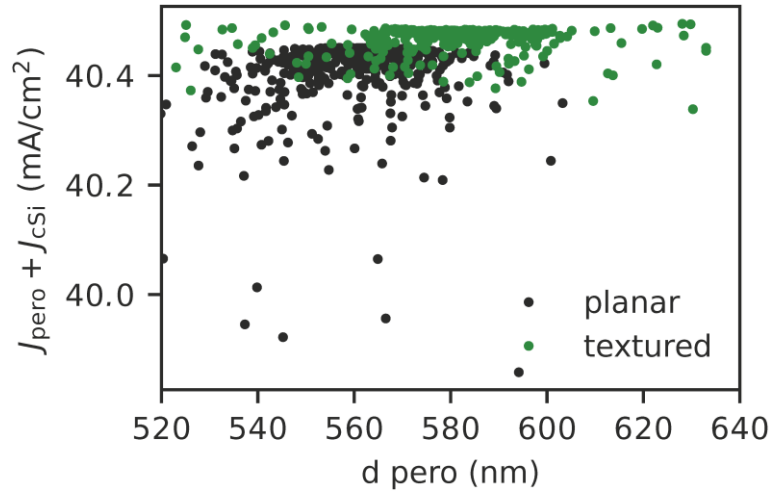

**Figure S7** | Combined photogenerated current density ( $J_{\text{Pero}}+J_{\text{Si}}$ ) of planar and nanotextured PSTSCs as a function of different perovskite layer thicknesses. The data points were generated with optical simulations using the finite element method. These simulations were part of a sensitivity analysis, which is discussed in the main manuscript and presented in Figs. 3e and 3f.

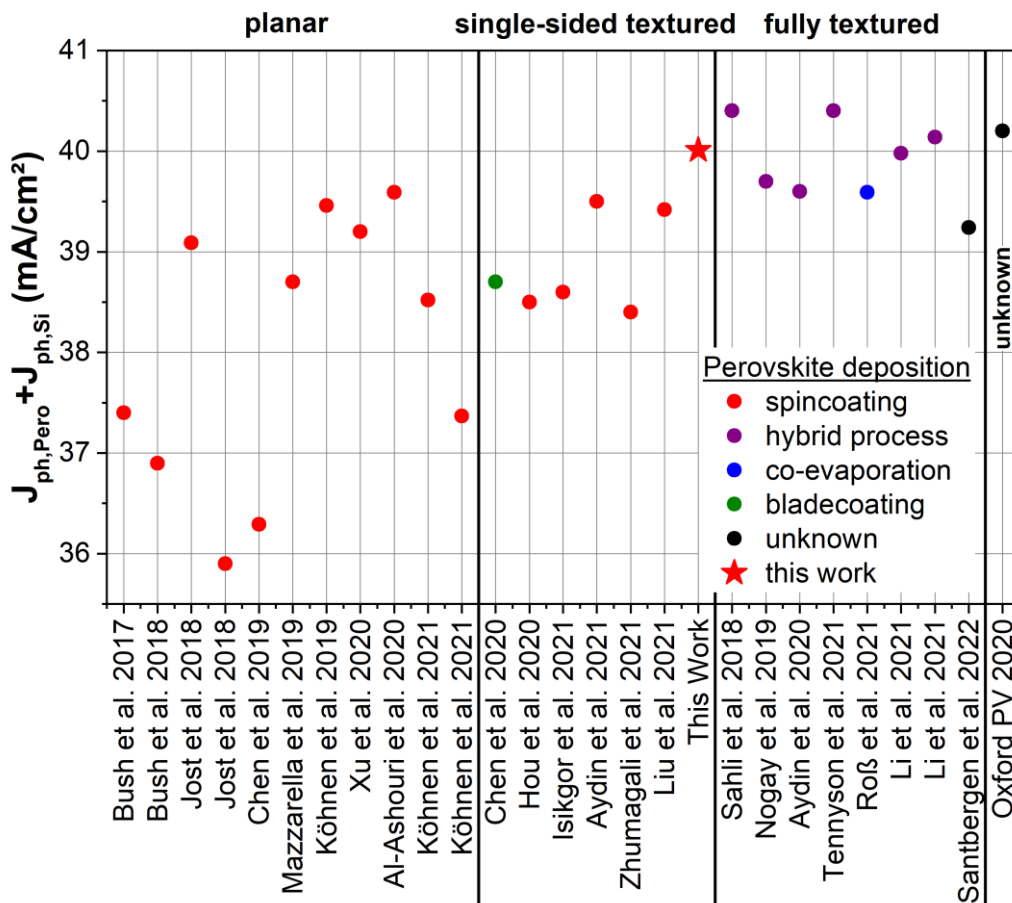

**Figure S8** | Combined photogenerated current density of perovskite and silicon sub cell ( $J_{\text{ph,Pero}}+J_{\text{ph,Si}}$ ) for selected publications of highly efficient perovskite/silicon tandem solar cells (PSTSC). The values are taken from the reported EQE-spectra in the respective publications. The graph is structured into PSTSCs with planar, single-sided and fully textured perovskite top cell.

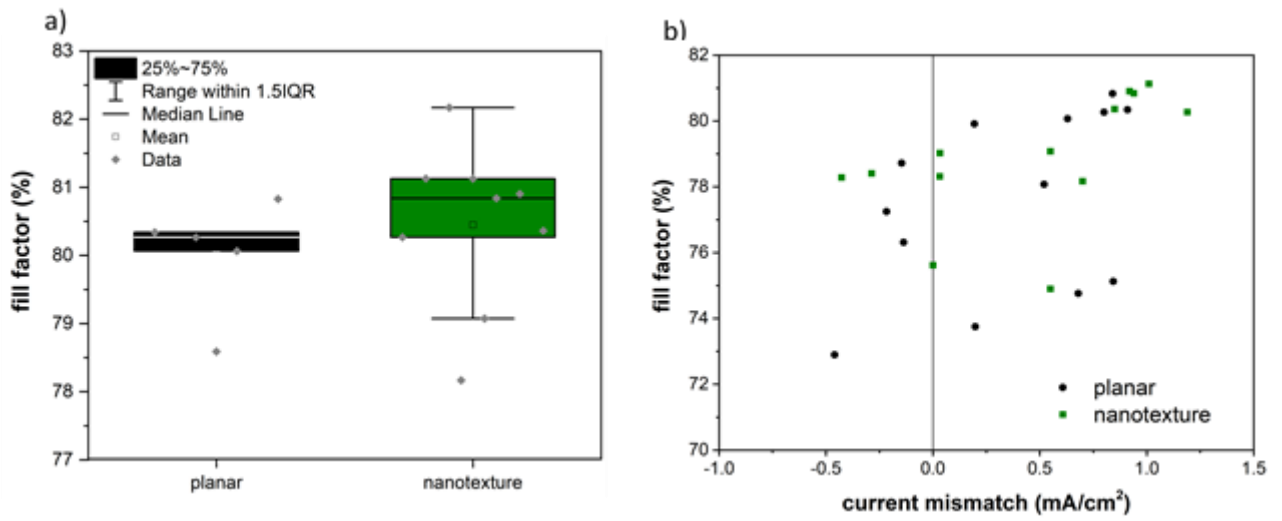

**Figure S9** | (a) Boxplots of the fill factor for nanotextured and planar tandem solar cells (one batch). (b) Fill factor ( $FF$ ) of various planar and nanotextured perovskite/silicon tandem solar cells (PSTSC) as a function of current mismatch ( $J_{ph,Pero} - J_{ph,Si}$ ) (various batches with bandgaps of 1.66 eV - 1.68 eV).

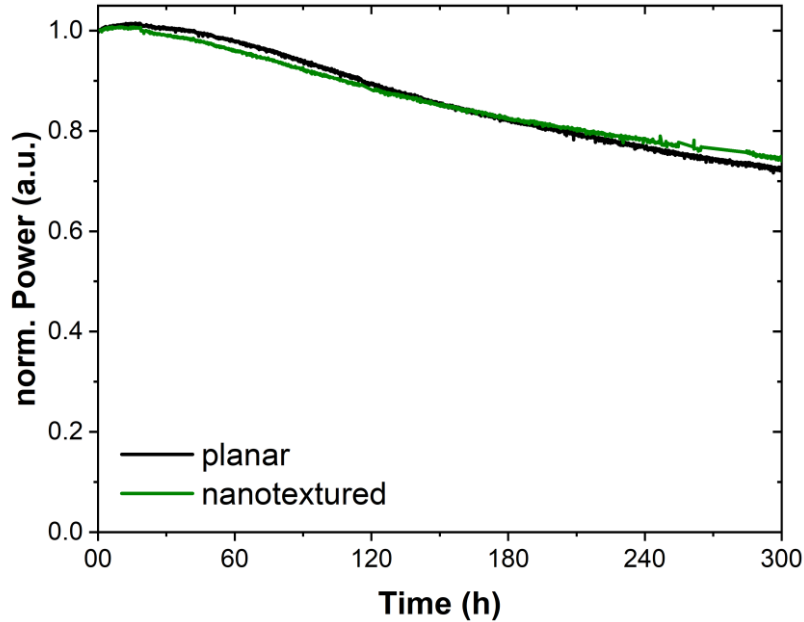

**Figure S10** | Long-term maximum power point (MPP) track under a dichromatic LED illumination of non-encapsulated perovskite/silicon tandem solar cells (PSTSC) in air at a controlled temperature of 25°C and relative humidity of 30 to 40%.

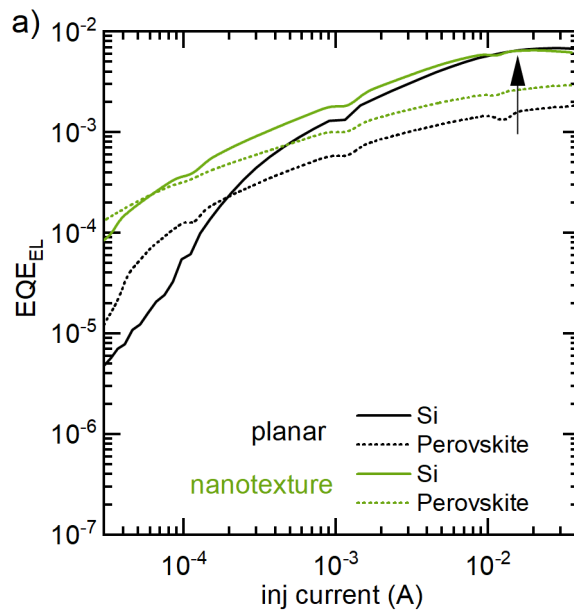

**Figure S11** | Electroluminescence quantum yield ( $EQE_{EL}$ ) of the perovskite and c-Si subcells in planar and nanotextured perovskite/silicon tandem solar cells (PSTSC). Interestingly, the Si  $EQE_{EL}$  changes barely, while the Perovskite increases by approximately 60% (relative) for the nanotextured device compared to the planar PSTSC.

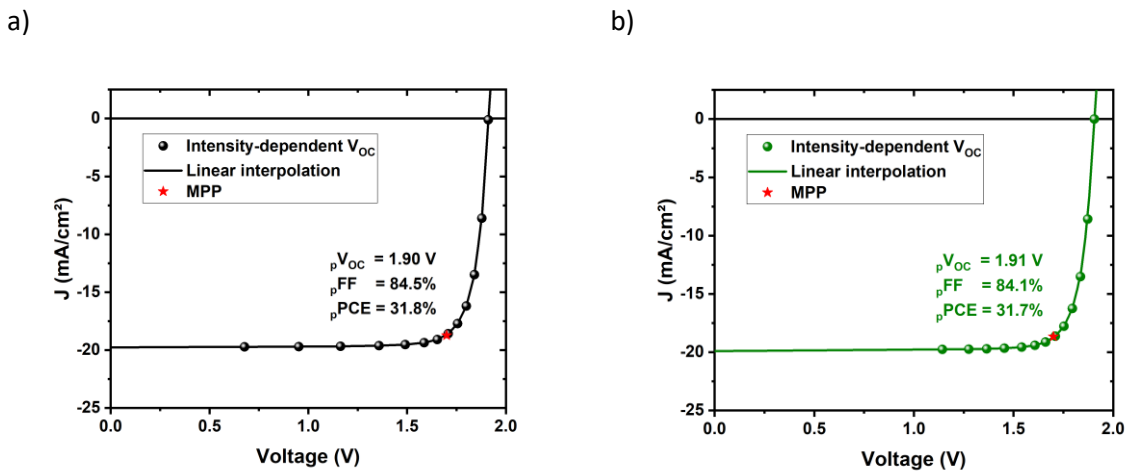

**Figure S12** | Pseudo  $JV$ -curves of a) planar and b) nanotextured PSTSC as determined from intensity-dependent  $JV$ -curves. The pseudo solar cell parameters are noted in the respective graphs.



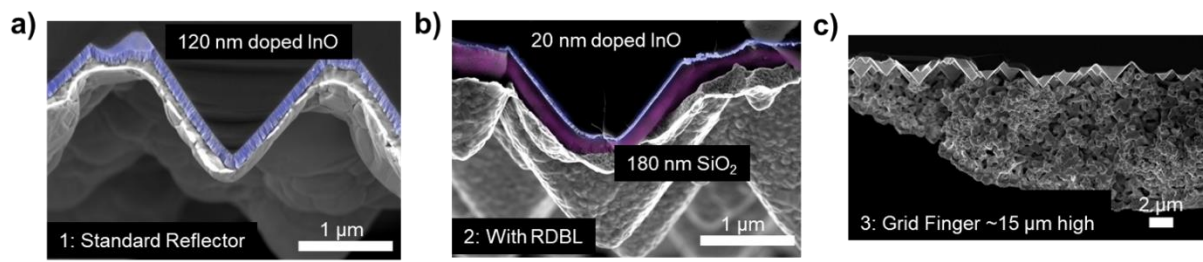

**Figure S13** | Cross-sectional scanning electron microscopy (SEM) images of different rear reflectors: 1. Standard reflector, 2. reflector with dielectric buffer layer (RDBL) and 3. Local contacts of the RDBL.

Figure S14 | Certificate of the 29.8% efficient PSTSC

Fraunhofer ISE CalLab PV Cells

Heidenhofstr.2

79110 Freiburg

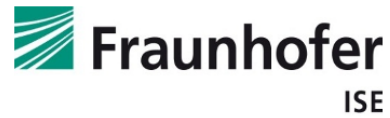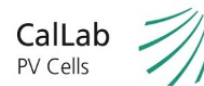

Werkskalibrierschein  
Proprietary calibration report

10005172HMI1020

|                                                      |                                                                                                                                                          |
|------------------------------------------------------|----------------------------------------------------------------------------------------------------------------------------------------------------------|
| Gegenstand<br><i>Object</i>                          | <b>monofacial solar cell</b>                                                                                                                             |
| Hersteller<br><i>Manufacturer</i>                    | <b>Helmholtz</b>                                                                                                                                         |
| Typ<br><i>Type</i>                                   | <b>PSC/Si</b>                                                                                                                                            |
| Fabrikat/Serien-Nr.<br><i>Serial number</i>          | <b>HMI005 / 180604</b>                                                                                                                                   |
| Auftraggeber<br><i>Customer</i>                      | Helmholtz-Center Berlin<br><b>Young Investigator Group Perovskite Tandem Solar Cells</b><br><b>Kekuléstr. 5</b><br><b>12489 Berlin</b><br><b>Germany</b> |
| Auftragsnummer<br><i>Order No.</i>                   | <b>172HMI1021</b>                                                                                                                                        |
| Anzahl der Seiten<br><i>Number of pages</i>          | <b>6</b>                                                                                                                                                 |
| Datum der Kalibrierung<br><i>Date of calibration</i> | <b>12.11.2021</b>                                                                                                                                        |

Kalibrierscheine ohne Unterschrift haben keine Gültigkeit. *Calibration certificates without signature are not valid.*

Datum  
*Date*

Leiter des Kalibrierlaboratoriums  
*Head of the calibration laboratory*

Bearbeiter  
*Person in charge*

16.11.2021

Jochen Hohl-Ebinger

Astrid Semeraro

## 1. Beschreibung des Kalibriergegenstandes

*Description of the calibrated object*

Das Messobjekt ist eine Tandem-Solarzelle . Typ: Perowskit/Silicium.  
*The device under test is a perovskite-silicon tandem solar cell.*

## 2. Messverfahren

*Measurement procedure*

Die Kalibrierung des Kalibrierobjektes wird gemäß /1/ mit einem Zweilampen-DC-Sonnensimulator durchgeführt. Die Einstrahlung wird mit Hilfe einer Monitorzelle während der gesamten Messdauer aufgenommen und deren Schwankungen bezüglich der Messung korrigiert. Die Divergenz der Randstrahlen ist  $< 5^\circ$ . Die Solarzelle wird auf einem Vakuumprobentisch thermisch stabilisiert.

*The calibration of the test sample was performed at Standard Testing Conditions (STC) with a dual light steady-state solar simulator according to /1/. The irradiance is controlled with a monitor cell during the measurement in order to correct fluctuations. The divergence of the peripheral beams is  $< 5^\circ$ . The solar cell is kept at a constant temperature*

Rückführung der Referenzsolarzellen/*Traceability of the reference solar cells :*

| Identitäts-Nr. /<br><i>Identity-Nr. :</i> | Kalibrierschein-Nr./<br><i>Certificate-Nr. :</i> | Rückführung/<br><i>Traceability :</i> |
|-------------------------------------------|--------------------------------------------------|---------------------------------------|
| ISE020008                                 | 47056-PTB-20                                     | PTB                                   |
| ISE021030                                 | 47077-PTB-21                                     | PTB                                   |

Die Korrektur der spektralen Fehlanpassung (Mismatch), die durch die Abweichung der spektralen Verteilung des Sonnen Simulators vom Standard-Spektrum AM1.5G /3/ in Kombination mit den verschiedenen spektralen Empfindlichkeiten von Referenzzelle und Messobjekt entsteht /4/, wurde durch eine erweiterte Mismatchberechnung /4/ - wie in /2/ beschrieben - korrigiert.

Dazu wurde die spektrale Verteilung der Bestrahlung (Sonnensimulator) mit einem Spektralradiometer und die spektrale Empfindlichkeit des Messobjektes mit einem laserbasierten Messplatz /5/ gemessen (s. Kalibrierschein Nr: 9005172HMI1020).

*The spectral mismatch - caused by the deviation of the simulator spectrum from the standard spectrum AM1.5G /3/ in combination with the difference between the spectral response of the reference cell and that of the device under test (DUT) – is calculated by a generalized mismatch correction /3/ as described in /2/.*

*For the spectral mismatch correction the spectral distribution of the solar simulator is measured with a spectroradiometer, the spectral response of the DUT is measured with a laser-based setup according to /5/ (cf. Calibration Mark: 9005172HMI1020).*

Der  $P_{MPP}$  wurde durch MPP-Tracking über 300s bestimmt. Der angegebene  $P_{MPP}$  ist der Mittelwert von 906-1205s dieser stabilisierten Messung. Anschließend wurde die IV-Kennlinie in zwei Richtungen ( $V_{OC} \rightarrow I_{SC}$  und  $I_{SC} \rightarrow V_{OC}$ ) aufgenommen.

*The  $P_{MPP}$  was determined by MPP-Tracking for 300s. The reported  $P_{MPP}$  represents the average value of the range 906-1205s of this stabilized measurement. Afterwards, the IV-curve was determined with a scan in both directions ( $V_{OC} \rightarrow I_{SC}$  and  $I_{SC} \rightarrow V_{OC}$ ).*

Die Rückführung der Spektralmessung auf SI-Einheiten erfolgte über den Vergleich mit einer Standardlampe.  
The traceability of the measurement of the spectral distribution to SI-Units is achieved using a standard lamp for the calibration of the spectroradiometer.

|                                    |                                           |                                |
|------------------------------------|-------------------------------------------|--------------------------------|
| Identitäts-Nr. /<br>Identity-Nr. : | Kalibrierschein-Nr./<br>Certificate-Nr. : | Rückführung/<br>Traceability : |
| BN-9101-451                        | 40006-20-PTB                              | PTB                            |

### 3. Messbedingungen

Measurement conditions

Standardtestbedingungen (STC) / Standard Testing Conditions (STC) :

Absolute Bestrahlungsstärke /  
Total irradiance : 1000 W/m<sup>2</sup>

Nominalwert der Temperatur des  
Messobjektes / Nominal Value of  
Temperature of the DUT : 25 °C

Spektrale Bestrahlungsstärke /  
Spectral irradiance distribution : AM1.5G Ed.4 (2019)

Die Messung der IV-Kennlinie (Strom-Spannungs-Kennlinie) des Messobjektes erfolgt mit Hilfe eines Vierquadranten-Netztes und eines Kalibrierwiderstandes. Die Temperatur der Solarzelle wird mit einem Tastsensor ermittelt und auf (25±0,5)°C eingestellt.

The measurement of the IV-curve is performed with a 4-quadrant power amplifier and a calibration resistor. The temperature of the solar cell is determined by a sensor and adjusted to (25±0.5)°C.

### 4. Messergebnis

Measurement results

Fläche / Area (da)<sup>1</sup>: = ( 1.0163 ± 0.0063 ) cm<sup>2</sup>

<sup>1</sup>: (t) = total area, (ap) = aperture area, (da) = designated illumination area /7/

Kennlinienparameter des Messobjektes unter Standardtestbedingungen (STC) / IV-curve parameter under Standard Testing Conditions (STC) :

|                               | Vorwärtsrichtung /<br>forwards scan direction | Rückwärtsrichtung /<br>reverse scan direction | steady state MPP    |
|-------------------------------|-----------------------------------------------|-----------------------------------------------|---------------------|
| V <sub>oc</sub>               | = ( 1919 ± 19 ) mV                            | ( 1919 ± 19 ) mV                              |                     |
| I <sub>sc</sub> (Ed.2 - 2008) | = ( 19.80 ± 0.38 ) mA                         | ( 19.74 ± 0.38 ) mA                           |                     |
| I <sub>MPP</sub>              | = 18.26 mA                                    | 18.17 mA                                      | ( 18.30 ± 0.51 ) mA |
| V <sub>MPP</sub>              | = 1652 mV                                     | 1652 mV                                       | ( 1655 ± 35 ) mV    |
| P <sub>MPP</sub>              | = 30.17 mW                                    | 30.01 mW                                      | ( 30.28 ± 0.81 ) mW |
| FF                            | = 79.4 %                                      | 79.2 %                                        |                     |
| η                             | =                                             |                                               | ( 29.80 ± 0.82 ) %  |

Angegeben ist jeweils die erweiterte Messunsicherheit, die sich aus der Standardmessunsicherheit durch Multiplikation mit dem Faktor  $k=2$  ergibt. Sie wurde gemäß dem "Guide to the expression of Uncertainty in Measurement" ermittelt. Sie entspricht bei einer Normalverteilung der Abweichungen vom Messwert einer Überdeckungswahrscheinlichkeit von 95%.

*The expanded measurement uncertainty resulting from the standard measurement uncertainty multiplied with a factor  $k=2$  is specified. The calculation was carried out according to the "Guide to the expression of Uncertainty in Measurement". The value corresponds to a Gaussian distribution denoting the deviations of the measurement value within a probability of 95%.*

## 5. Zusatzinformationen

Additional information

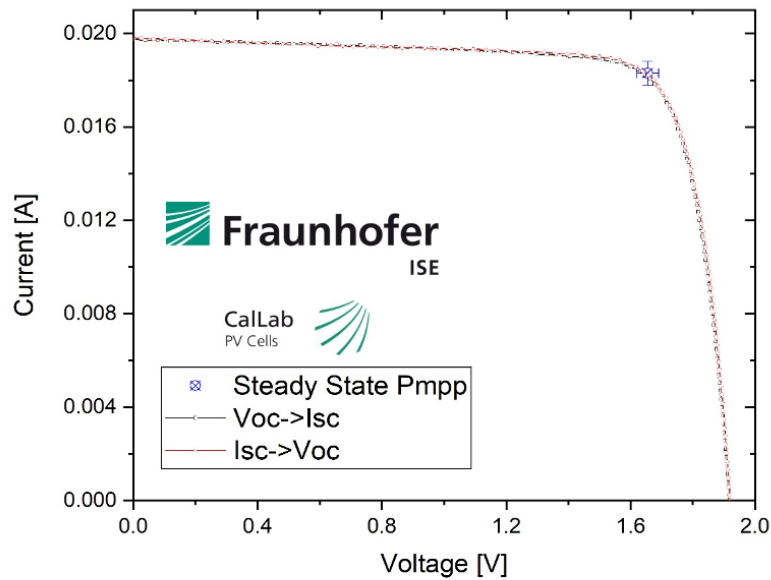

Angegeben ist jeweils die erweiterte Messunsicherheit, die sich aus der Standardmessunsicherheit durch Multiplikation mit dem Faktor  $k=2$  ergibt. Sie wurde gemäß dem "Guide to the expression of Uncertainty in Measurement" ermittelt. Sie entspricht bei einer Normalverteilung der Abweichungen vom Messwert einer Überdeckungswahrscheinlichkeit von 95%.

*The expanded measurement uncertainty resulting from the standard measurement uncertainty multiplied with a factor  $k=2$  is specified. The calculation was carried out according to the "Guide to the expression of Uncertainty in Measurement". The value corresponds to a Gaussian distribution denoting the deviations of the measurement value within a probability of 95%.*

## 5. Zusatzinformationen

Additional information



Steady State Pmpp

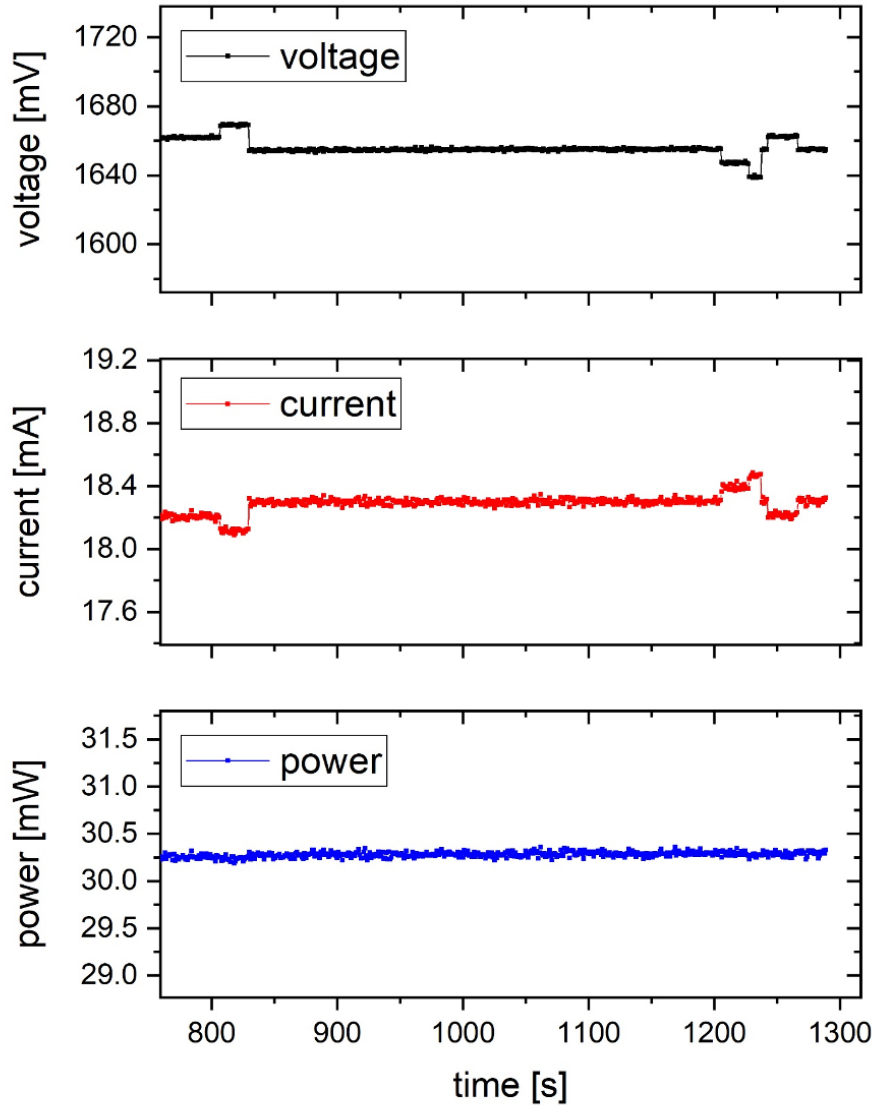

## 6.Literatur

### Literature

- /1/ IEC 60904-1-Ed.3:2020, *Photovoltaic devices - Part 1: Measurement of photovoltaic current-voltage characteristics*
- /2/ M. Meusel, R. Adelhelm, F. Dimroth, A.W. Bett, W. Warta Spectral Mismatch Correction and Spectrometric Characterization of Monolithic III-V Multi-junction Solar Cells Prog. Photovolt: Res. Appl. 10 (2002) p. 243–255
- /3/ IEC 60904-3-Ed.4:2019, *Photovoltaic devices - Part 3: Measurement principles for terrestrial photovoltaic (PV) solar devices with reference spectral irradiance data*
- /4/ IEC 60904-7-Ed.4:2019, *Photovoltaic devices - Part 7: Computation of the spectral mismatch error introduced in the testing of a photovoltaic device*
- /5/ IEC 60904-8-Ed.3:2014, *Photovoltaic devices - Part 8: Measurement of the spectral responsivity of a photovoltaic (PV) device*
- /6/ IEC 60904-9-Ed.3:2020, *Photovoltaic devices - Part 9: Solar simulator performance requirements*
- /7/ M.A. Green, K. Emery, Y. Hishikawa, W. Warta, and E. D. Dunlop, *Solar cell efficiency tables (version 39)*. Progress in Photovoltaics: Research and Applications, 2012. 20: p. 12-20.

**Hinweis:** Es ist nicht gestattet, ohne die schriftliche Genehmigung des ISE CaLab PV Cells den Werkskalibrierschein auszugsweise zu vervielfältigen.

**Note:** *This proprietary calibration report may not be reproduced other than in full. Extracts may be taken only by the written permission of ISE CaLab PV Cells.*



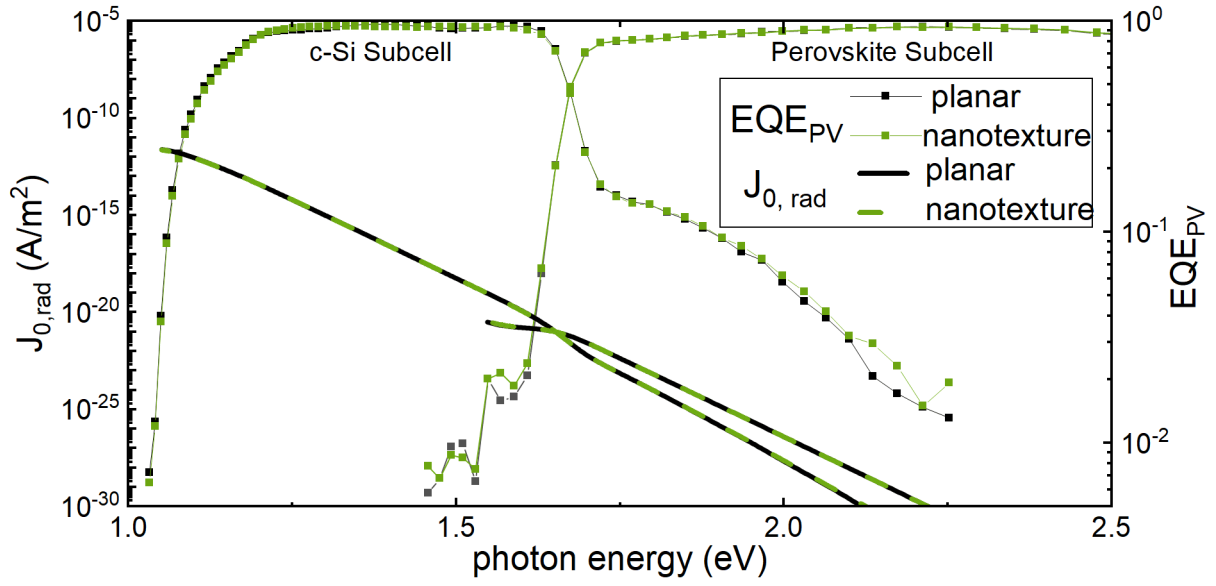

**Figure S15** | External quantum efficiency ( $EQE_{PV}$ ) onset of the silicon and perovskite subcells and their emitted spectral photon flux calculated when the device is in equilibrium with the black-body (BB) radiation of the surroundings at 300K according to equation S1 and S2.

$$J_{0,rad} = \int EQE \phi_{BB} d\epsilon \quad (\text{eq. S1})$$

with

$$\phi_{BB} = \frac{1}{4\hbar^3 c^2} \cdot \frac{E^2}{\exp\left(\frac{E}{k_B T}\right) - 1} \quad (\text{eq. S2})$$

**Table S1** | Summary of the derived  $J_{0,rad}$  values for the respective perovskite top and silicon bottom cells

|             | $J_{0,rad}$<br>perovskite<br>subcell<br>(A/m <sup>2</sup> ) | $J_{0,rad}$<br>silicon<br>subcell<br>(A/m <sup>2</sup> ) |
|-------------|-------------------------------------------------------------|----------------------------------------------------------|
| planar      | $3.14 \times 10^{-21}$                                      | $2.39 \times 10^{-12}$                                   |
| nanotexture | $3.42 \times 10^{-21}$                                      | $2.28 \times 10^{-12}$                                   |

**Table S2 | Details of the 3D optical simulations with the finite element method (FEM)**

The materials and layer thicknesses used for the optical simulations presented in Figures 3d-f. All thicknesses (except Si) are given in nm, the bold thicknesses resulted from the Bayesian optimization. The references for refractive index data are given in the second column. Further, the optimized photo-current densities are shown.

|                                                      |      | Planar     | Nanotextured           |
|------------------------------------------------------|------|------------|------------------------|
| Lithium fluoride (LiF)                               | [S1] | 110        | 110                    |
| Indium zinc oxide (IZO)                              | [S2] | 90         | 90                     |
| Tin oxide (SnO <sub>2</sub> )                        | [S2] | 10         | 10                     |
| C <sub>60</sub>                                      | [S3] | 23         | 23                     |
| Perovskite <sup>1</sup>                              | [S3] | <b>563</b> | <b>583<sup>2</sup></b> |
| Indium tin oxide (ITO)                               | [S3] | 21         | 21                     |
| Nanocrystalline silicon oxide (nc-SiO <sub>x</sub> ) | [S4] | <b>101</b> | <b>110</b>             |
| Intrinsic amorphous hydrogenated Si (a-Si:H)         | [S5] | 5          | 5                      |
| Crystalline silicon (wafer, Si)                      | [S6] | 300 μm     | 300 μm                 |
| $J_{ph,max}$ (mA/cm <sup>2</sup> )                   |      | 20.22      | 20.24                  |

1 As we did not have optical data for the perovskite used in this work, we performed the simulations with optical data for the triple-cation perovskite Cs<sub>0.05</sub>(MA<sub>0.17</sub>FA<sub>0.83</sub>)Pb(I<sub>0.83</sub>Br<sub>0.17</sub>)<sub>3</sub> with ≈ 1.64 eV bandgap instead. The self-assembled monolayer (SAM) between ITO and perovskite can be omitted in the optical simulations due to its negligible thickness.

2 For the nanotextured device, the perovskite layer is not conformal. The thickness denotes the thickness of a planar layer with the same volume.

**Table S3 | Details of the 1D optical simulations with GenPro4**

The materials and layer thicknesses used for the optical simulations considering the solar cell layer stack shown in Figure 5. All thicknesses (except Si) are given in nm. The references for refractive index data are given in the second column.

|                                                      |      | Planar                  |
|------------------------------------------------------|------|-------------------------|
| Lithium fluoride (LiF)                               | [S1] | 110 nm                  |
| Indium zinc oxide (IZO)                              | [S2] | 90 nm                   |
| Tin oxide (SnO <sub>2</sub> )                        | [S2] | 10 nm                   |
| C <sub>60</sub>                                      | [S3] | 23 nm                   |
| perovskite <sup>1</sup>                              | [S3] | 569 nm                  |
| Doped indium oxide (InO) interlayer                  | [S7] | 20 nm                   |
| Nanocrystalline silicon oxide (nc-SiO <sub>x</sub> ) | [S4] | 107 nm                  |
| Intrinsic amorphous hydrogenated Si (a-Si:H)         | [S8] | 5 nm                    |
| Crystalline silicon (wafer, Si)                      | [S5] | 260 μm                  |
| p-doped amorphous hydrogenated Si (p-a:Si:H)         | [S4] | 10 nm                   |
| Doped indium oxide (InO) rear-side                   | [S7] | 10-200 nm<br>10nm Steps |
| Silicon oxide (SiO <sub>2</sub> )                    | [S7] | 0-300 nm<br>10 nm Steps |
| Silver (Ag)                                          | [S9] | 400 nm                  |

**Table S4 | Quokka3 simulation parameters**

| Parameter                               | Value, Property, Model, Variation             | Unit                |
|-----------------------------------------|-----------------------------------------------|---------------------|
| Dimensions                              | 2                                             |                     |
| Unit Cell Thickness                     | 260                                           | $\mu\text{m}$       |
| Unit Cell width                         | 20000                                         | $\mu\text{m}$       |
| -                                       |                                               |                     |
| <b>Material Group</b>                   |                                               |                     |
| Optical Generation Model Type           | Text-Z model obtained from GenPro4 Simulation |                     |
| Auger Model                             | Si-Altarmatt2011                              |                     |
| Radiative Recombination Model           | Si-Nguyen                                     |                     |
| Density of State                        | Si-Green1990                                  |                     |
| Intrinsic Carrier Density Model         | user-const                                    |                     |
| Intrinsic Carrier Density $n_{i0}$      | 9.65e9                                        | $\text{cm}^{-3}$    |
| Silicon Mobility Model                  | Si-Klaassen1992                               |                     |
| Si Band Gap Narrowing Model             | Si-Schenk1998                                 |                     |
| Doping Setting Type                     | dopingtype-resistivity                        |                     |
| Doping Type                             | n-type                                        |                     |
| Doping Resistivity                      | 3                                             | $\Omega\text{cm}$   |
| Bulk Recombination Type                 | intrinsic plus SRH                            |                     |
| Bulk Recombination SRH Type             | $\tau-E_c$                                    |                     |
| Bulk Recombination SRH $\tau_n$         | 1000                                          | $\mu\text{s}$       |
| Bulk Recombination SRH $\tau_p$         | 10000                                         | $\mu\text{s}$       |
| Bulk Recombination SRH $\tau_{E_c-E_v}$ | 0                                             | eV                  |
| -                                       |                                               |                     |
| <b>Electron Selective Contact</b>       |                                               |                     |
| Geometry Plane                          | front                                         |                     |
| Geometry Shape                          | full                                          |                     |
| Electrical Model Type                   | lumped                                        |                     |
| Sheet Resistance ( $R_{sh}$ )           | 0.001                                         | $\Omega$            |
| Conduction Type                         | n-type                                        |                     |
| Vertical Resistivity Type               | ohmic                                         |                     |
| Vertical Resistivity                    | 0.05                                          | $\Omega\text{cm}^2$ |
| Contact Recombination Type              | Surface effective Recombination ( $S_{eff}$ ) |                     |
| Contact Recombination $S_{eff}$         | 1.2                                           | $\text{cm/s}$       |
| -                                       |                                               |                     |
| <b>Electron Contact Feature</b>         |                                               |                     |
| Geometry Plane                          | front                                         |                     |
| Geometry Shape                          | full                                          |                     |
| Ohmic Resistivity (TCO/Metal)           | 3e-4                                          | $\Omega\text{cm}^2$ |
| Current Transport Model                 | ohmic                                         |                     |
| -                                       |                                               |                     |
| <b>Electron Metal Feature</b>           |                                               |                     |
| Geometry Plane                          | front                                         |                     |
| Geometry Shape                          | full                                          |                     |
| Polarity                                | n-type                                        |                     |
| Sheet Resistance ( $R_{sh}$ )           | 1.5e-3                                        | $\Omega$            |
| Shading Fraction                        | 0                                             |                     |
| -                                       |                                               |                     |
| <b>Hole Selective Contact</b>           |                                               |                     |

|                                 |                                               |                     |
|---------------------------------|-----------------------------------------------|---------------------|
| Geometry Plane                  | rear                                          |                     |
| Geometry Shape                  | full                                          |                     |
| Electrical Model Type           | lumped                                        |                     |
| Sheet Resistance ( $R_{sh}$ )   | 95–216                                        | $\Omega$            |
| Conduction Type                 | p-type                                        |                     |
| Vertical Resistivity Type       | ohmic                                         |                     |
| Vertical Resistivity            | 0.2                                           | $\Omega\text{cm}^2$ |
| Contact Recombination Type      | Surface effective Recombination ( $S_{eff}$ ) |                     |
| Contact Recombination $S_{eff}$ | 1.2                                           | cm/s                |
| <b>Hole Contact Feature</b>     |                                               |                     |
| Geometry Plane                  | rear                                          |                     |
| Geometry Shape                  | rectangle                                     |                     |
| Geometry Size X (width)         | 40                                            | $\mu\text{m}$       |
| Geometry Pitch X (finger pitch) | 500–2500                                      | $\mu\text{m}$       |
| Ohmic Resistivity (TCO/Metal)   | 1e–5                                          | $\Omega\text{cm}^2$ |
| Current Transport Model         | ohmic                                         |                     |
| <b>Hole Metal Feature</b>       |                                               |                     |
| Geometry Plane                  | rear                                          |                     |
| Geometry Shape                  | rectangle                                     |                     |
| Geometry Size X (width)         | 40                                            | $\mu\text{m}$       |
| Geometry Pitch X (finger pitch) | 500–2500                                      | $\mu\text{m}$       |
| Polarity                        | p-type                                        |                     |
| Sheet Resistance ( $R_{sh}$ )   | 1.5e–3                                        | $\Omega$            |
| Shading Fraction                | 0                                             |                     |

[S1] H. H. Li, “Refractive index of alkali halides and its wavelength and temperature derivatives,” J. Phys. Chem. Ref. Data, vol. 5, no. 2, pp. 329–528, 1976. doi.org/10.1063/1.555536

[S2] M. Jošt, E. Köhnen, A. B. Morales-Vilches, et al., “Textured interfaces in monolithic perovskite/silicon tandemsolar cells: advanced light management for improved efficiency and energy yield,” Energy Environ. Sci., vol. 11, no. 12, pp. 3511–3523, 2018. doi.org/10.1039/C8EE02469C

[S3] A. Tejada Esteves, Personal Communication. 2020

[S4] L. Mazzarella, M. Werth, K. Jäger, et al., “Infrared photocurrent management in monolithic perovskite/silicon heterojunction tandem solar cells by using a nanocrystalline silicon oxide interlayer,” Optic Express, vol. 26, no. 10, p. A487, 2018. Doi.org/10.1364/OE.26.00A487

[S5] K. Jäger, L. Korte, B. Rech, and S. Albrecht, “Numerical optical optimization of monolithic planar perovskite-silicon tandem solar cells with regular and inverted device architectures”. *Opt. Express* 25, A473 (2017).

[S6] M. A. Green and M. J. Keevers, “Optical properties of intrinsic silicon at 300 K,” Prog. Photovoltaics Res. Appl., vol. 3, no. 3, pp. 189–192, 1995. doi.org/10.1002/pip.4670030303

[S7] Cruz, A. *et al.* Optoelectrical analysis of TCO+Silicon oxide double layers at the front and rear side of silicon heterojunction solar cells. *Solar Energy Materials and Solar Cells* 236, 111493 (2022).

[S8] Chen, B. et al. Blade-Coated Perovskites on Textured Silicon for 26%-Efficient Monolithic Perovskite/Silicon Tandem Solar Cells. *Joule* 4, 850–864 (2020).

[S9] Yajie Jiang, Supriya Pillai and Martin A. Green, 'Realistic Silver Optical Constants for Plasmonics', Scientific Reports, vol. 6, no. 1, pp.30605, (2016)
